# Supplementary material for: Flexible dicarboxylate based pillar-layer metal organic frameworks: differences in structure and porosity by tuning the pyridyl based N,N′ linkers
Source: Royal Society of Chemistry journal article supplement (doi:10.1039/c3ce42028k), 2013-12-10
Supplement: c3ce42028k.pdf [file c3ce42028k.pdf]

## Supporting Information

**Table S1.** Selected Bond Length (Å) and Bond Angles (°) of complex **1**

|                         |            |                         |            |
|-------------------------|------------|-------------------------|------------|
| Co1-O1                  | 2.0539(19) | Co1-O3                  | 2.1463(9)  |
| Co1-O4                  | 2.2068(12) | Co1-O5                  | 2.0201(8)  |
| Co1-N6                  | 2.148(2)   | Co-N7 <sup>a</sup>      | 2.133(2)   |
| Co2-O1                  | 2.3019(19) | Co2-O2                  | 2.1628(17) |
| Co2-O6                  | 2.0428(11) | Co2-N1                  | 2.178(2)   |
| Co2-N5                  | 2.176(2)   | Co2-O8 <sup>b</sup>     | 2.000 (12) |
| O1-Co1-O3               | 100.01(6)  | O2-Co2-N1               | 90.16(7)   |
| O1-Co1-O4               | 160.10(6)  | O2-Co2-N5               | 87.07(7)   |
| O1-Co1-O5               | 102.71(6)  | O2-Co2-O8 <sup>b</sup>  | 116.31(6)  |
| O1-Co1-N6               | 88.16(8)   | O6-Co2-N1               | 91.52(6)   |
| O1-Co1-N7 <sup>a</sup>  | 91.87(8)   | O6-Co2-N5               | 91.38(6)   |
| O3-Co1-O4               | 60.16(4)   | O6-Co2-O8 <sup>b</sup>  | 92.78(4)   |
| O3-Co1-O5               | 157.27(4)  | N5-Co2-N1               | 177.05(8)  |
| O3-Co1-N6               | 88.27(6)   | O3-Co1-N7 <sup>a</sup>  | 90.66(7)   |
| O8 <sup>b</sup> -Co2-N1 | 87.93(7)   | O4-Co1-O5               | 97.11(3)   |
| O4-Co1-N6               | 89.44(6)   | O8 <sup>b</sup> -Co2-N5 | 92.40(7)   |
| O4-Co1-N7 <sup>a</sup>  | 90.17(7)   | Co1-O1-Co2              | 118.68(8)  |
| O5-Co1-N6               | 91.74(6)   | O5-Co1-N7 <sup>a</sup>  | 89.31(6)   |
| N6-Co1-N7 <sup>a</sup>  | 178.92(8)  | O1-Co2-N1               | 86.31(7)   |
| O1-Co2-O2               | 57.77(7)   | O1-Co2-N5               | 93.05(7)   |
| O2-Co2-O6               | 150.90(6)  | O1-Co2-O8 <sup>b</sup>  | 171.69(6)  |
| O1-Co2-O6               | 93.35(5)   |                         |            |

Symmetry Code:  $a = -x, 1-y, 1-z$ ,  $b = 1-x, 2-y, 1-z$ .

**Table S2.** Hydrogen Bonding Interactions of Complex 2-4 (Å, °)

| Complex | D-H...A                        | D-H    | H...A  | D...A     | ∠D-H...A |
|---------|--------------------------------|--------|--------|-----------|----------|
| 1       | O1S-H1S...O7                   | 0.8200 | 1.8800 | 2.666(2)  | 161.00   |
|         | O2S-H2S...O4                   | 0.8200 | 2.0700 | 2.846(2)  | 158.00   |
|         | O1W-H1WA ... O3 <sup>i</sup>   | 0.8500 | 2.2000 | 2.636(5)  | 112.00   |
|         | O1W-H1WB ... O2 <sup>ii</sup>  | 0.8500 | 2.0700 | 2.779(4)  | 140.00   |
|         | O1W-H1WB ... O1 <sup>iii</sup> | 0.8500 | 2.2800 | 2.958(5)  | 137.00   |
| 2       | O2W-H2WA...O4 <sup>i</sup>     | 0.8600 | 1.8800 | 2.673(6)  | 153.00   |
|         | O2W-H2WB...O3W <sup>iv</sup>   | 0.8600 | 2.2000 | 3.046(11) | 166.00   |
|         | O3W-H3WB...O5W <sup>v</sup>    | 0.8500 | 2.5300 | 2.930(2)  | 110.00   |
|         | O5W-H5WA...O3W <sup>vi</sup>   | 0.8500 | 2.3300 | 2.930(2)  | 128.00   |
|         | O4W-H4WB... O3                 | 0.8500 | 1.8900 | 2.666(12) | 151.00   |
| 3       | O1W-H1WA ... O3 <sup>vii</sup> | 0.8500 | 1.9000 | 2.721(3)  | 162.00   |
|         | O1W-H1WA...O4 <sup>viii</sup>  | 0.8500 | 1.9000 | 2.720(3)  | 161.00   |
|         | O1W-H1WB...O1 <sup>ix</sup>    | 0.8500 | 1.9500 | 2.738(3)  | 154.00   |
| 4       | O3W-H3WA...O3                  | 0.8500 | 2.1600 | 2.815(6)  | 134.00   |
|         | O3W-H3WB...O2W                 | 0.8500 | 2.1200 | 2.966(5)  | 172.00   |
|         | O2W-H2WB...O3W <sup>x</sup>    | 0.8500 | 2.2100 | 3.055(5)  | 170.00   |
| 5       | C6-H6...O1S <sup>xi</sup>      | 0.9300 | 2.4300 | 3.324(5)  | 161.00   |

Symmetry Code : (i) = 1-x,2-y,-z ; (ii) = x,y,-1+z; (iii) = x,3/2-y,-1/2+z; (iv) = 1-x,2-y,1-z; (v) = -x,1/2+y,1/2-z; (vi) = -x,-1/2+y,1/2-z; (vii) = 2-x,1-y,2-z; (viii) = 1+x,-1+y,z; (ix) = 2-x,2-y,1-z; (x) = 1+x, y, z; (xi) = x, 1+y, z.

**Table S3.** Selected Bond Length (Å) and Bond Angles (°) of Complex 2

|                                      |            |                         |            |
|--------------------------------------|------------|-------------------------|------------|
| Co1-O1                               | 2.055(3)   | Co1-O1W                 | 2.056(3)   |
| Co1-O2W                              | 2.158(3)   | Co1-N1                  | 2.150(4)   |
| Co1-O2 <sup>a</sup>                  | 2.118(3)   | Co1-N4 <sup>b</sup>     | 2.166(5)   |
| O1-Co1-O1W                           | 178.28(14) | O1-Co1-O2W              | 95.82(13)  |
| O1-Co1-N1                            | 90.94(13)  | O1-Co1-O2 <sup>a</sup>  | 80.70(12)  |
| O1-Co1-N4 <sup>b</sup>               | 90.17(14)  | O1W-Co1-O2W             | 85.90(13)  |
| O1W-Co1-N1                           | 89.14(13)  | O1W-Co1-O2 <sup>a</sup> | 97.59(12)  |
| O1W-Co1-N4 <sup>b</sup>              | 89.75(14)  | O2W-Co1-N1              | 91.21(13)  |
| O2 <sup>a</sup> -Co1-O2W             | 176.32(12) | O2W-Co1-N4 <sup>b</sup> | 89.17(13)  |
| O2 <sup>a</sup> -Co1-N1              | 87.69(13)  | N1-Co1-N4 <sup>b</sup>  | 178.79(15) |
| O2 <sup>a</sup> -Co1-N4 <sup>b</sup> | 92.01(13)  |                         |            |

Symmetry Code:  $a = x, 3/2-y, -1/2+z$ ,  $b = 1+x, 3/2-y, 1/2+z$ .

**Table S4.** Selected Bond Length (Å) and Bond Angles (°) of Complex **3**

|                         |            |                                      |            |
|-------------------------|------------|--------------------------------------|------------|
| Zn1-O1                  | 2.411(4)   | Zn1-N1                               | 2.057(3)   |
| Zn1-O1W                 | 2.032(2)   | Zn1-O3 <sup>a</sup>                  | 2.041(2)   |
| Zn1-O2                  | 2.021(3)   | Zn1-O4 <sup>a</sup>                  | 2.443(2)   |
| O1-Zn1-O1W              | 104.75(11) | O1W-Zn1-O2                           | 93.57(11)  |
| O1-Zn1-O2               | 57.41(12)  | O1W-Zn1-N1                           | 101.41(10) |
| O1-Zn1-N1               | 87.42(11)  | O1W-Zn1-O3 <sup>a</sup>              | 97.17(10)  |
| O1-Zn1-O3 <sup>a</sup>  | 154.62(10) | O1W-Zn1-O4 <sup>a</sup>              | 153.84(9)  |
| O1-Zn1-O4 <sup>a</sup>  | 98.67(10)  | O2-Zn1-N1                            | 144.39(13) |
| O2-Zn1-O3 <sup>a</sup>  | 109.22(11) | O4 <sup>a</sup> -Zn1-N1              | 91.01(10)  |
| O2-Zn1-O4 <sup>a</sup>  | 89.26(10)  | O3 <sup>a</sup> -Zn1-O4 <sup>a</sup> | 57.59(9)   |
| O3 <sup>a</sup> -Zn1-N1 | 100.78(11) |                                      |            |

Symmetry code:  $a = -1+x, y, z.$

**Table S5.**  $\pi$ - $\pi$  interactions in Complex **3**

| Ring(i) →<br>Ring(j)    | Distance of centroid(i)<br>from ring(j),(Å) | Dihedral angle<br>(i,j) (deg) | Distance between the (i,j)<br>ring centroids,(Å) |
|-------------------------|---------------------------------------------|-------------------------------|--------------------------------------------------|
| R(1)→ R(2) <sup>i</sup> | 3.953(2)                                    | 9.3 (2)                       | 3.6277(18)                                       |
| R(2)→ R(1)              | 3.953(2)                                    | 9.3 (2)                       | 3.4986(16)                                       |

Symmetry code: (i) = -x,-y, 1-z ; R(i)/R(j) denotes the ith/jth rings: R(1) = N(1)/C(10)/C(11)/C(12)/C(13)/C(14); R(2) = N(4)/C(24)/C(25)/C(27)/C(28)/C(33).

**Table S6.** Selected Bond Length (Å) and Bond Angles (°) of Complex **4**

|                         |            |                         |            |
|-------------------------|------------|-------------------------|------------|
| Zn1-O1                  | 2.060(2)   | Zn1-O1W                 | 2.031(3)   |
| Zn1-O2                  | 2.349(3)   | Zn1-N1                  | 2.033(3)   |
| Zn1-O4 <sup>a</sup>     | 1.958(2)   | O4 <sup>a</sup> -Zn1-N1 | 124.26(10) |
| O1-Zn1-O1W              | 90.42(10)  | O1-Zn1-O2               | 57.94(10)  |
| O1-Zn1-N1               | 123.22(10) | O1-Zn1-O4 <sup>a</sup>  | 107.34(9)  |
| O1W-Zn1-O2              | 147.52(10) | O1W-Zn1-N1              | 101.35(10) |
| O1W-Zn1-O4 <sup>a</sup> | 100.06(10) | O2-Zn1-N1               | 91.67(10)  |
| O2-Zn1-O4 <sup>a</sup>  | 96.73(10)  |                         |            |

Symmetry Code:  $a = x, -1+y, z.$

**Table S7.** Selected Bond Length (Å) and Bond Angles (°) of Complex **5**

|                                      |           |                                      |           |
|--------------------------------------|-----------|--------------------------------------|-----------|
| Cd1-O1                               | 2.427(2)  | Cd1-O2                               | 2.357(3)  |
| Cd1-N1                               | 2.317(2)  | Cd1-O3 <sup>d</sup>                  | 2.371(2)  |
| Cd1-O4 <sup>d</sup>                  | 2.527(3)  | Cd1-N2 <sup>c</sup>                  | 2.325(2)  |
| Cd1-O4 <sup>b</sup>                  | 2.333(2)  | O1-Cd1-O2                            | 54.30(7)  |
| O1-Cd1-N1                            | 92.17(7)  | O1-Cd1-N2 <sup>c</sup>               | 91.31(7)  |
| O1-Cd1-O3 <sup>d</sup>               | 85.27(7)  | O1-Cd1-O4 <sup>b</sup>               | 147.57(8) |
| O1-Cd1-O4 <sup>d</sup>               | 137.29(7) | O2-Cd1-N1                            | 95.03(9)  |
| O3 <sup>d</sup> -Cd1-O4 <sup>b</sup> | 127.15(9) | O2-Cd1-O3 <sup>d</sup>               | 139.38(7) |
| O3 <sup>d</sup> -Cd1-N1              | 89.73(8)  | O2-Cd1-O4 <sup>d</sup>               | 166.80(7) |
| O4 <sup>d</sup> -Cd1-N1              | 91.03(8)  | O2-Cd1-N2 <sup>c</sup>               | 85.87(9)  |
| N1-Cd1-N2 <sup>c</sup>               | 176.25(7) | O2-Cd1-O4 <sup>b</sup>               | 93.36(8)  |
| O4 <sup>b</sup> -Cd1-N1              | 88.14(7)  | O4 <sup>d</sup> -Cd1-N2 <sup>c</sup> | 87.37(8)  |
| O3 <sup>d</sup> -Cd1-O4 <sup>d</sup> | 52.16(7)  | O4 <sup>d</sup> -Cd1-O4 <sup>b</sup> | 75.09(8)  |
| O3 <sup>d</sup> -Cd1-N2 <sup>c</sup> | 91.95(8)  | O4 <sup>b</sup> -Cd1-N2 <sup>c</sup> | 88.17(7)  |

Symmetry Code:  $a = 1+x, y, z$ ,  $b = 2-x, 2-y, 1-z$ ,  $c = x, -1+y, -1+z$ ,  $d = -1+x, y, z$ .

**Table S8.** Selected Bond Length (Å) and Bond Angles (°) of Complex **6**

|                                      |           |                                      |           |
|--------------------------------------|-----------|--------------------------------------|-----------|
| Cd1-O1                               | 2.292(2)  | Cd1-O3                               | 2.397(2)  |
| Cd1-O4                               | 2.437(3)  | Cd1-N1                               | 2.333(2)  |
| Cd1-N4 <sup>b</sup>                  | 2.317(2)  | Cd1-O1 <sup>a</sup>                  | 2.563(2)  |
| Cd1-O2 <sup>b</sup>                  | 2.316(2)  | O1-Cd1-O3                            | 94.31(8)  |
| O1-Cd1-N1                            | 88.73(8)  | O1-Cd1-N4 <sup>b</sup>               | 91.76(8)  |
| O1-Cd1-O1 <sup>a</sup>               | 77.58(8)  | O1-Cd1-O2 <sup>a</sup>               | 129.13(9) |
| O3-Cd1-O4                            | 52.39(9)  | O3-Cd1-N1                            | 87.33(9)  |
| O3-Cd1-N4 <sup>b</sup>               | 90.00(9)  | O1 <sup>a</sup> -Cd1-O3              | 170.27(8) |
| O2 <sup>a</sup> -Cd1-O3              | 135.99(9) | O4-Cd1-N1                            | 96.48(10) |
| O4-Cd1-N4 <sup>b</sup>               | 81.65(10) | O1 <sup>a</sup> -Cd1-O4              | 134.52(8) |
| O2 <sup>a</sup> -Cd1-O4              | 85.05(9)  | N1-Cd1-N4 <sup>b</sup>               | 177.32(9) |
| O1 <sup>a</sup> -Cd1-N1              | 97.72(8)  | O2 <sup>a</sup> -Cd1-N1              | 86.99(8)  |
| O1 <sup>a</sup> -Cd1-N4 <sup>b</sup> | 84.96(9)  | O2 <sup>b</sup> -Cd1-N4 <sup>b</sup> | 94.74(8)  |
| O1 <sup>a</sup> -Cd1-O2 <sup>a</sup> | 52.99(8)  | Cd1-O1-Cd1 <sup>a</sup>              | 102.02(8) |
| O1-Cd1-O4                            | 145.74(9) |                                      |           |

Symmetry Code:  $a = 1/2-x, y, 7/4-z$ ,  $b = x, 1+y, z$ .

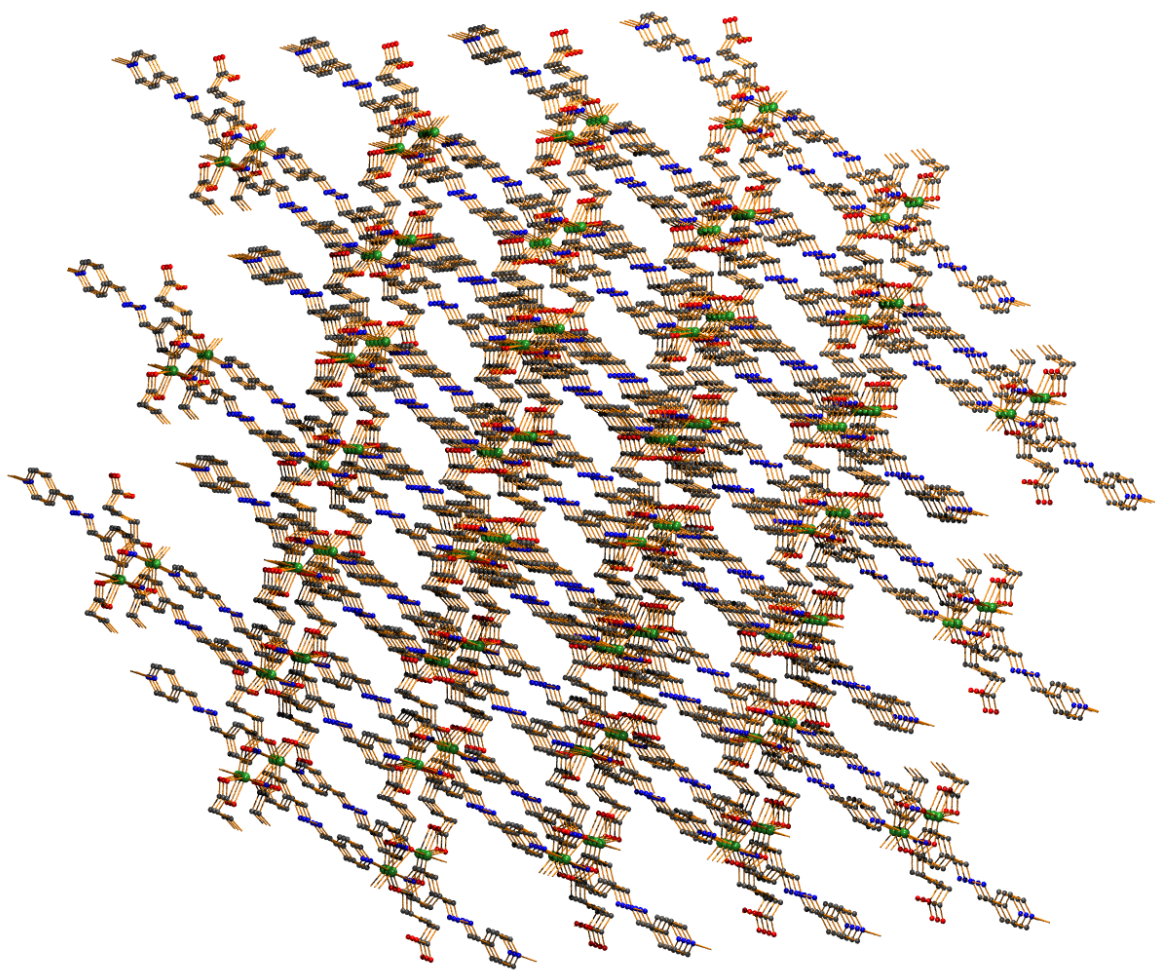

**FigureS1.** The packing diagram for the 2D grids in **1**

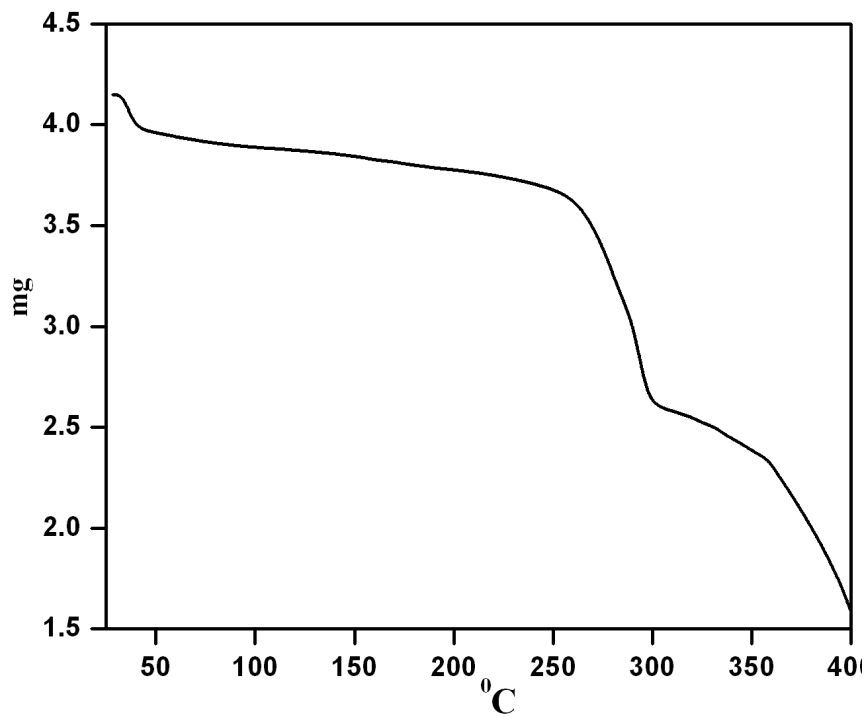

**FigureS2.** TGA of **1** under nitrogen atmosphere

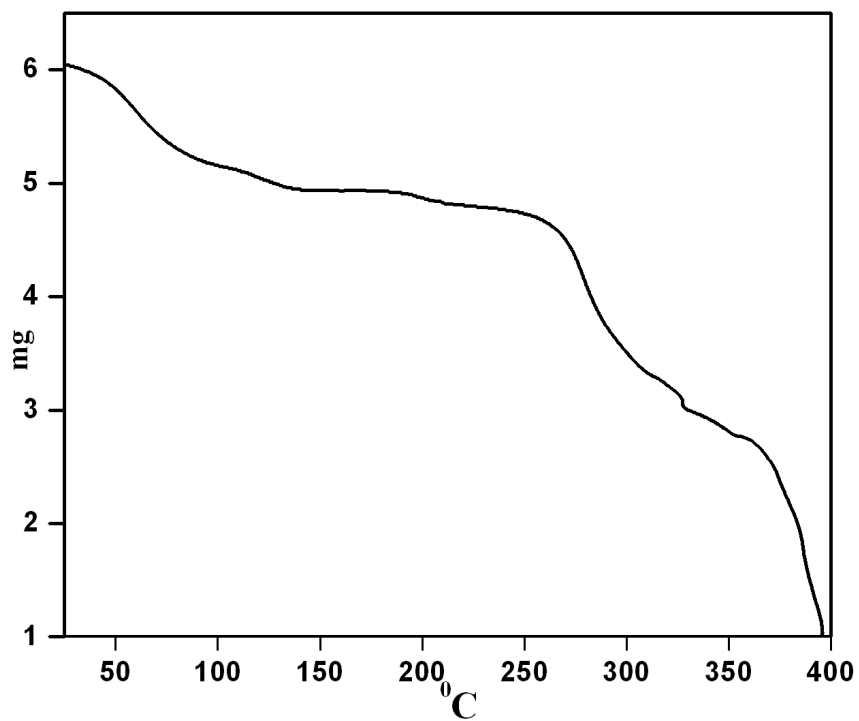

**Figure S3.** TGA of **2** under nitrogen atmosphere

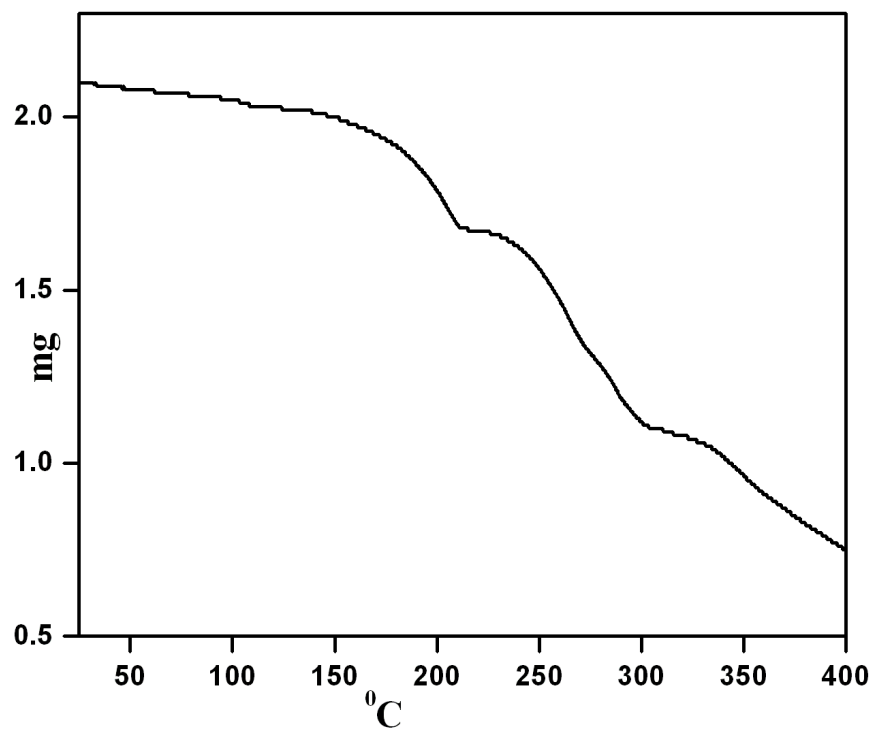

Figure S4. TGA of 3 under nitrogen atmosphere

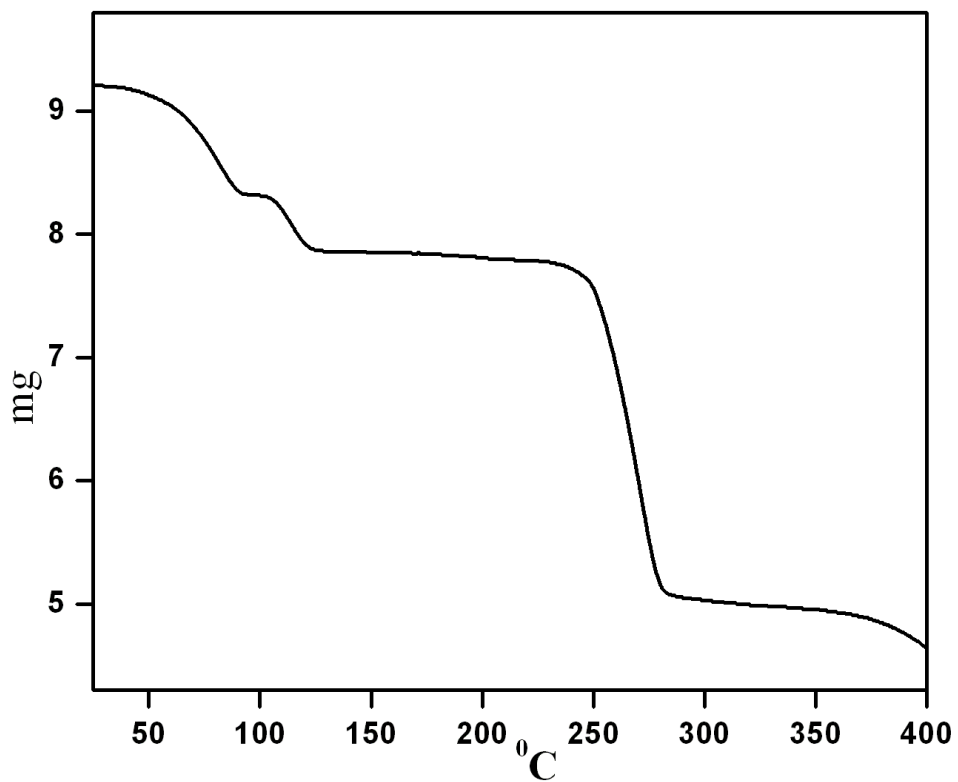

Figure S5. TGA of 4 under nitrogen atmosphere

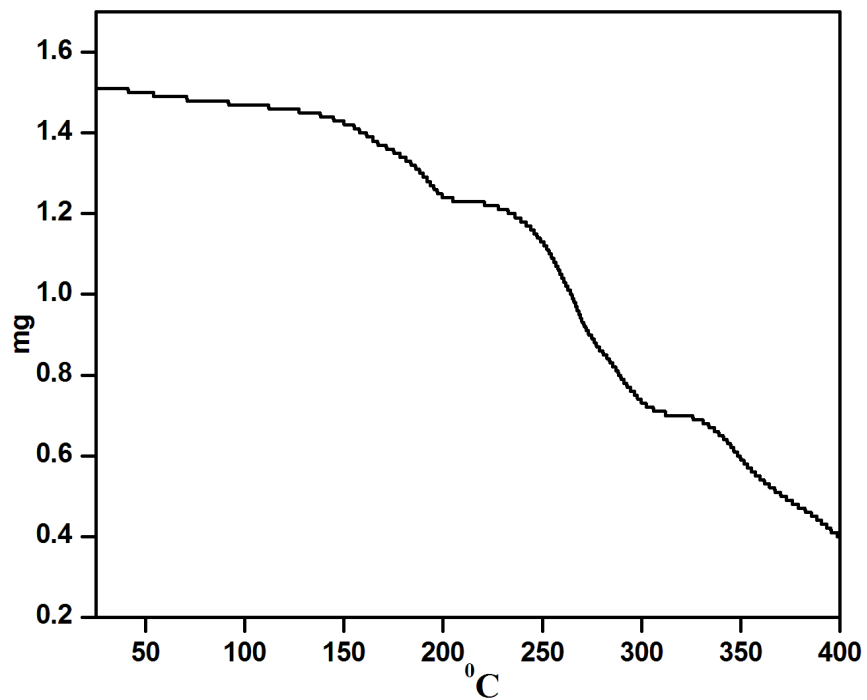

**Figure S6.** TGA of **5** under nitrogen atmosphere

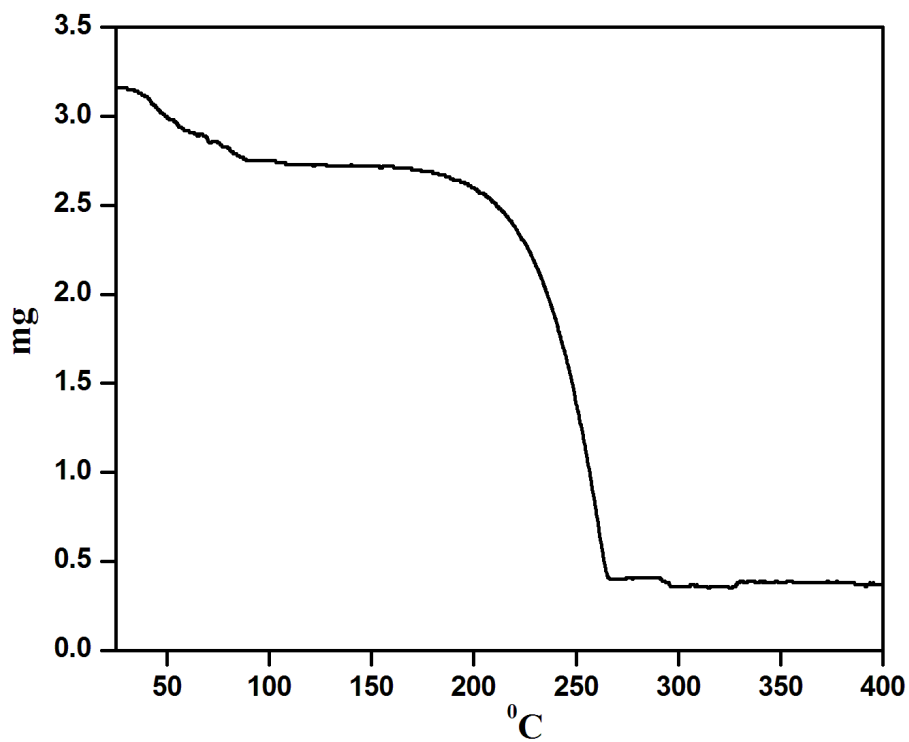

**Figure S7.** TGA of **6** under nitrogen atmosphere



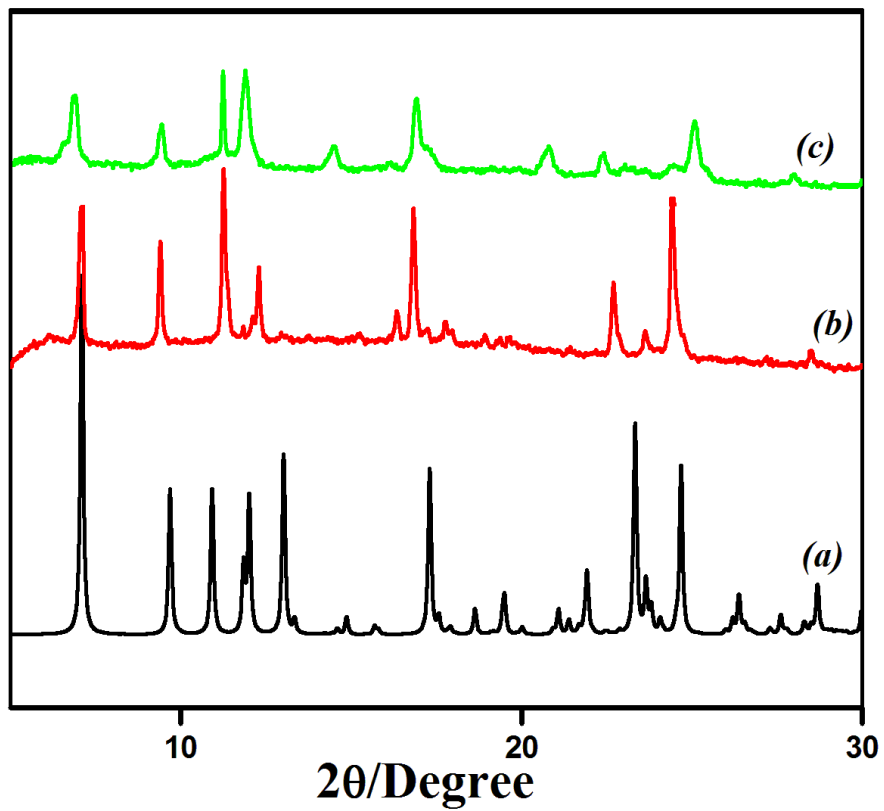

**Figure S8.** PXRD patterns of **1** in different states (a) Simulated from X-ray single crystal data; (b) bulk as-synthesized compound; (c) de-solvated

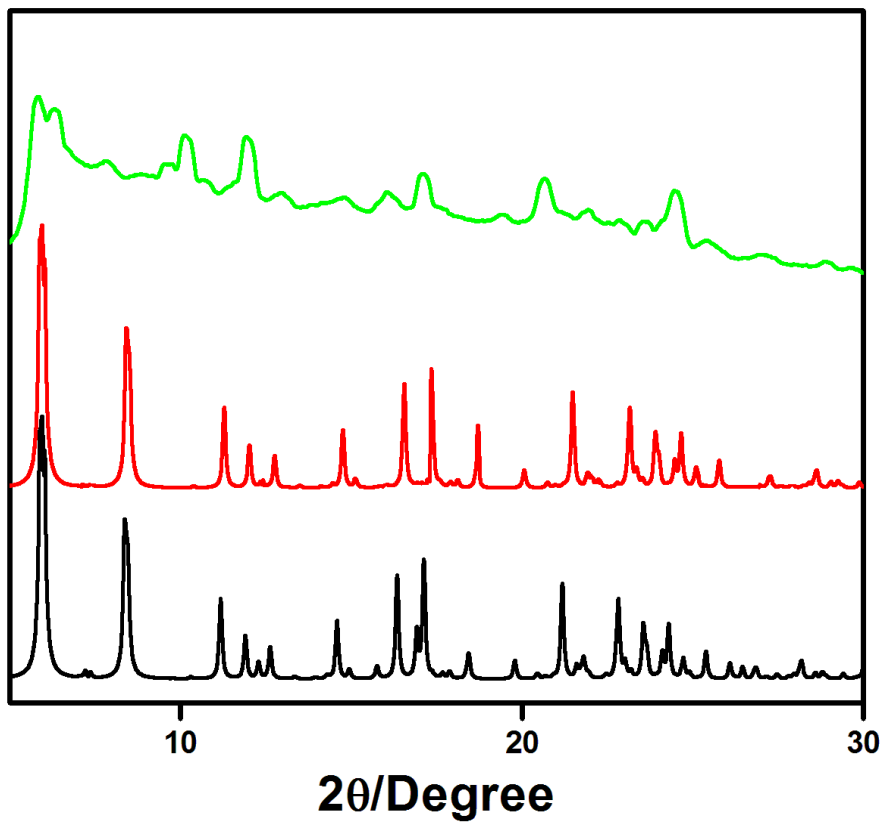

**Figure S9.** PXRD patterns of **2** in different states (a) Simulated from X-ray single crystal data; (b) bulk as-synthesized compound; (c) de-solvated

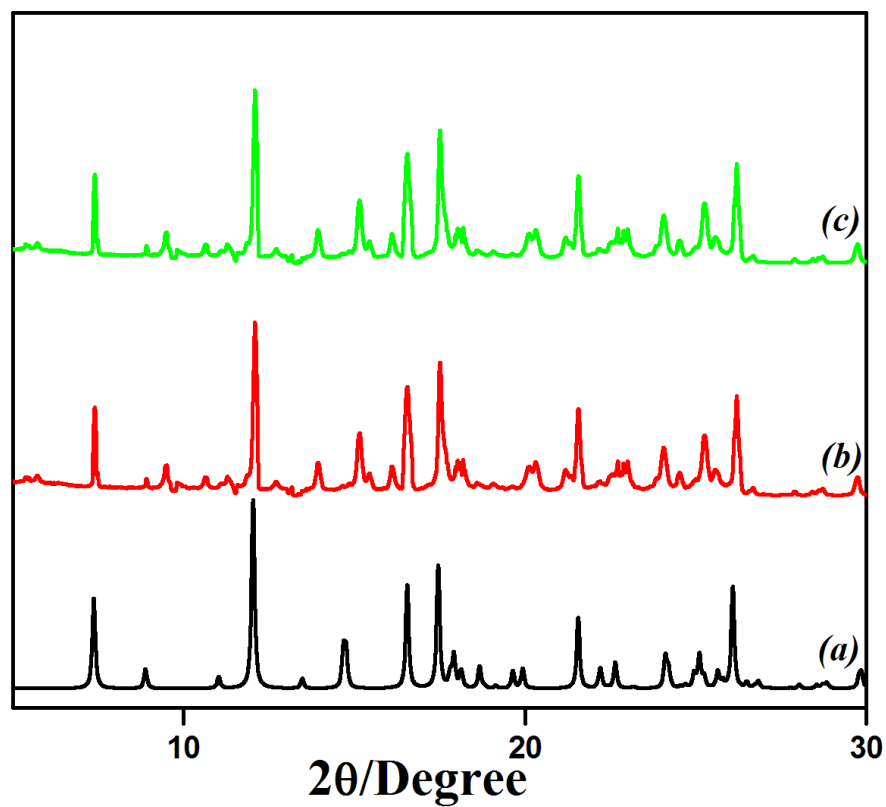

**Figure S10.** PXR D patterns of **3** in different states (a) Simulated from X-ray single crystal data; (b) bulk as-synthesized compound; (c) de-solvated

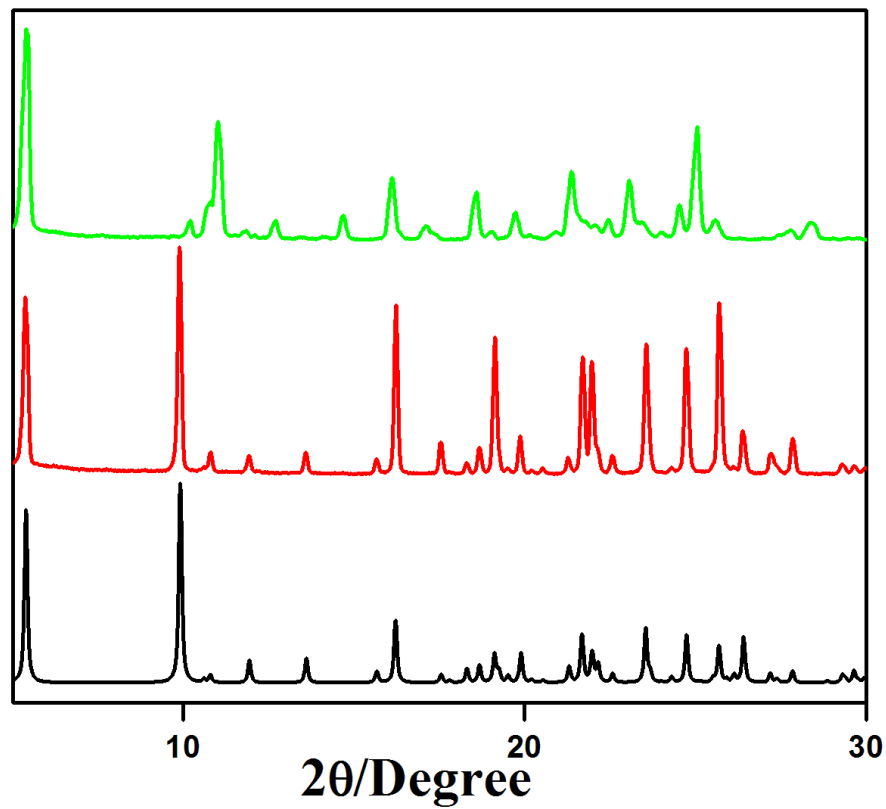

**Figure S11.** PXRD patterns of **4** in different states (a) Simulated from X-ray single crystal data; (b) bulk as-synthesized compound; (c) de-solvated

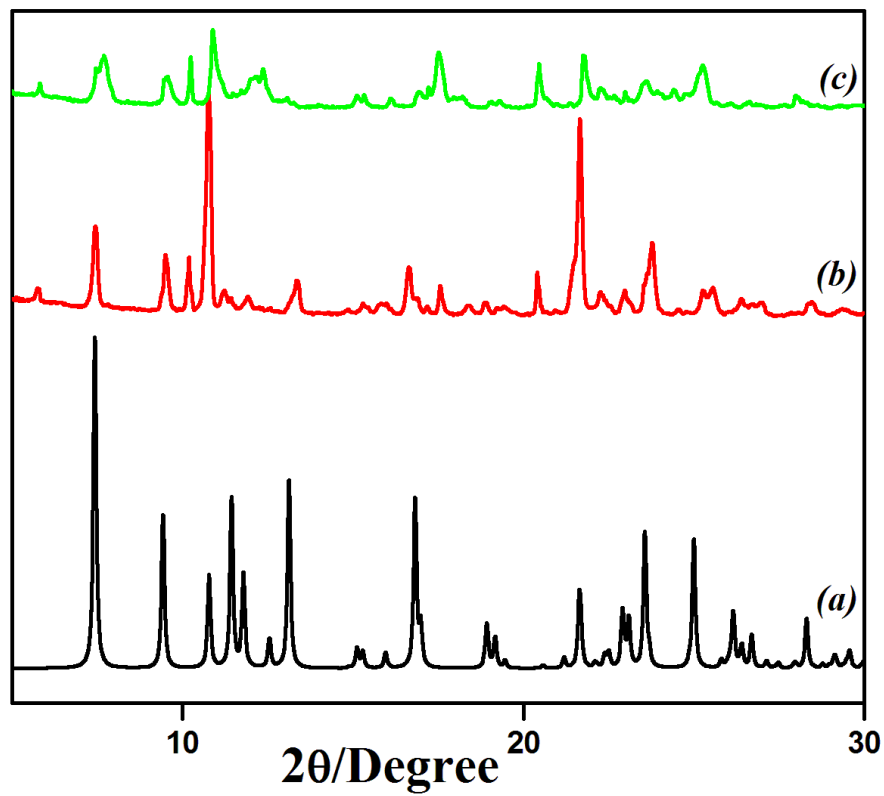

**Figure S12.** PXRD patterns of **5** in different states (a) Simulated from X-ray single crystal data; (b) bulk as-synthesized compound; (c) de-solvated

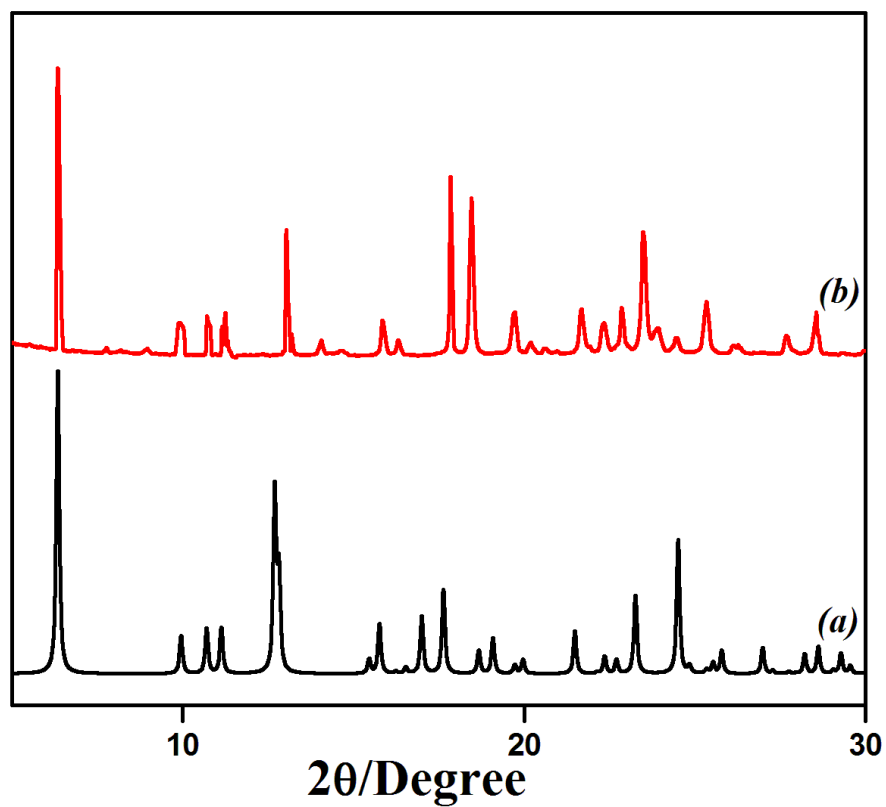

**Figure S13.** PXRD patterns of **6** in different states (a) Simulated from X-ray single crystal data; (b) bulk as-synthesized compound.

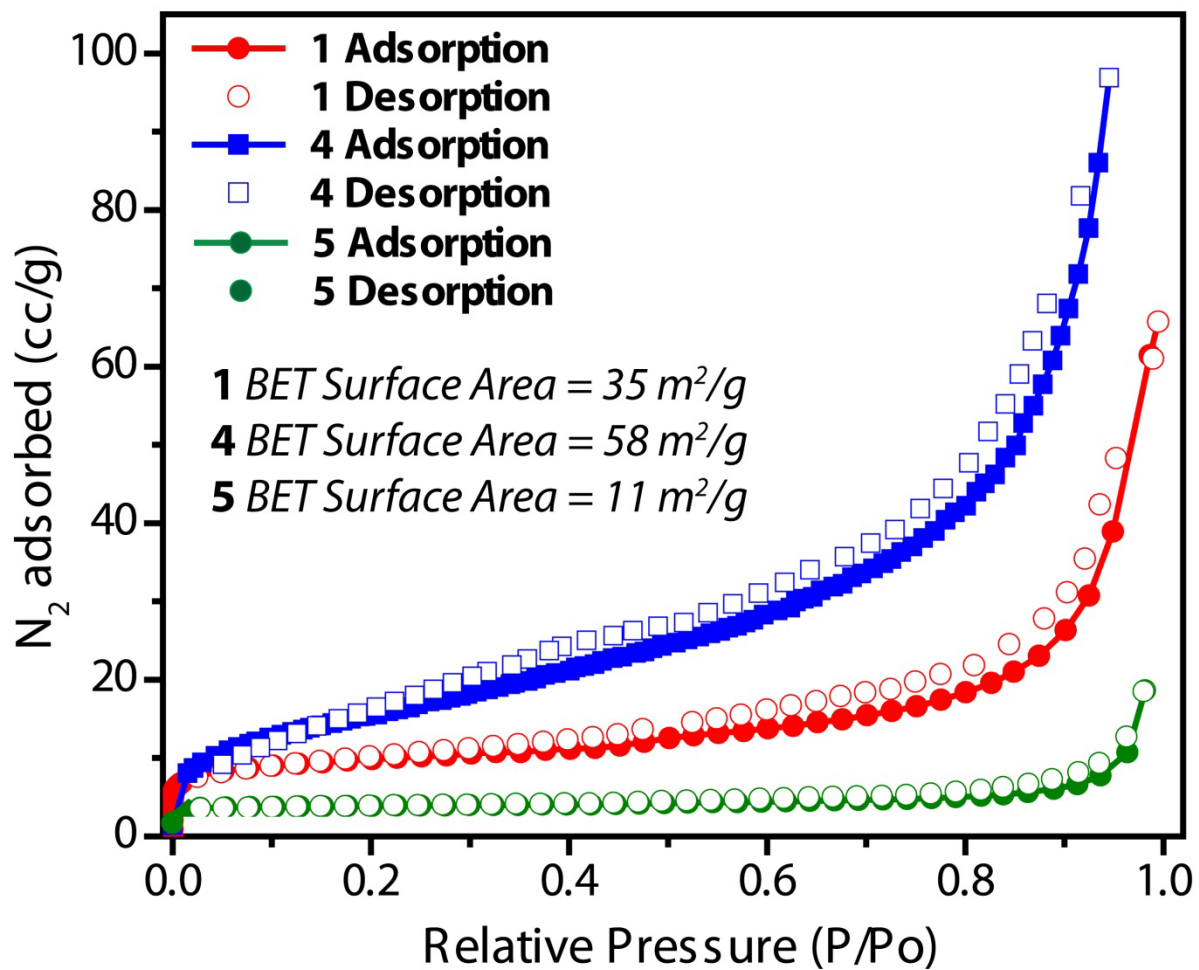

**Figure S14.** N<sub>2</sub> adsorption isotherms for compounds **1**, **4** and **5** collected at 77 K (The filled and open shapes in the figures represents the adsorption and desorption branches, respectively).
